# Supplementary material for: Sialidase Activity in the Cervicovaginal Fluid Is Associated With Changes in Bacterial Components of Lactobacillus-Deprived Microbiota
Source: PubMed Central journal article supplement (PMC8793624; doi:10.3389/fcimb.2021.813520), 2022-01-13

## Supplementary tables

**Supplementary table 1. Demographic, behavioral and clinical characteristics of the 140 study participants.**

| Characteristics                                       | N or median | % or range  |
|-------------------------------------------------------|-------------|-------------|
| <b>Age</b> (years); median (range)                    | 33          | 18 - 51     |
| <b>Ethnicity</b>                                      |             |             |
| White                                                 | 80          | 57.1        |
| Non-white                                             | 60          | 42.9        |
| <b>Body mass index<sup>a</sup></b> ; median (range)   | 25.9        | 17.6 - 53.0 |
| <b>Marital status</b>                                 |             |             |
| Single                                                | 51          | 36.4        |
| In a steady relationship (living with partner)        | 89          | 63.6        |
| <b>Years at school<sup>b</sup></b> ; median (range)   | 9           | 0-16        |
| <b>Has any personal income<sup>c</sup></b>            |             |             |
| No                                                    | 57          | 40.7        |
| Yes                                                   | 83          | 59.3        |
| <b>Smoker</b>                                         |             |             |
| No                                                    | 110         | 78.6        |
| Yes                                                   | 30          | 21.4        |
| <b>Number of sex partner</b> (prior 12 months)        |             |             |
| 0 or 1                                                | 126         | 90.0        |
| 2 or more                                             | 14          | 10.0        |
| <b>New sex partner</b> (prior 4 months)               |             |             |
| No                                                    | 117         | 83.6        |
| Yes                                                   | 23          | 16.4        |
| <b>Abnormal vaginal discharge treated in the past</b> |             |             |
| No                                                    | 77          | 55.0        |
| Yes                                                   | 63          | 45.0        |
| <b>History of sexually transmitted infections</b>     |             |             |
| No                                                    | 127         | 90.7        |
| Yes                                                   | 13          | 9.3         |
| <b>Frequency of condom use</b>                        |             |             |
| Never                                                 | 99          | 70.7        |
| Inconsistent                                          | 19          | 13.6        |
| Consistent                                            | 22          | 15.7        |
| <b>Hormonal contraceptive use</b>                     |             |             |
| No                                                    | 80          | 57.1        |
| Oral                                                  | 46          | 32.9        |
| Injectable                                            | 14          | 10.0        |
| <b>Cervical infection detected at enrollment</b>      |             |             |
| None                                                  | 130         | 92.9        |
| Positive for <i>Chlamydia trachomatis</i>             | 8           | 5.7         |
| Positive for <i>Neisseria gonorrhoeae</i>             | 2           | 1.4         |

| Characteristics                            | N or median | % or range |
|--------------------------------------------|-------------|------------|
| <b>Vaginal microbiota (Nugent scoring)</b> |             |            |
| 0-3 Normal (scores 0 - 3)                  | 75          | 53.6       |
| 4-6 Intermediate (scores 4 - 6)            | 17          | 12.1       |
| 7-10 Bacterial vaginosis (scores 7 - 10)   | 48          | 34.3       |

<sup>a</sup> BMI: body mass index defined as weight (kg) divided by height squared (meters).

<sup>b</sup> Number of school grades approved.

<sup>c</sup> Has a personal income from a formal or informal job.

Z

**Supplementary Table 2.** Overall relative abundances (RAs) of taxa retrieved from molecular assessment of vaginal samples. Overall RAs were obtained by the sum of median (=10784) rarefied read counts of each taxon across samples. Sum of each taxon was then divided by total read counts of the study (2139017), those with overall RAs <0.001 were not included at LefSe (red).

| Taxa                           | Overall RA (%) | Cumulative overall RA (%) |
|--------------------------------|----------------|---------------------------|
| <i>Lactobacillusiners</i>      | 30.777919      |                           |
| <i>Lactobacilluscrispatus</i>  | 23.707339      | 54.48526                  |
| <i>Gardnerellavaginalis</i>    | 8.441398       | 62.92666                  |
| BVAB1                          | 5.107998       | 68.03465                  |
| <i>Atopobiumvaginae</i>        | 4.218023       | 72.25268                  |
| <i>Lactobacillusgasseri</i>    | 4.199165       | 76.45184                  |
| <i>Lactobacillusjensenii</i>   | 3.305398       | 79.75724                  |
| <i>Megasphaerasp.type1</i>     | 2.891484       | 82.64872                  |
| <i>Sneathiasanguinegens</i>    | 2.548393       | 85.19712                  |
| <i>Lactobacillushelveticus</i> | 2.222530       | 87.41965                  |
| <i>Leptotrichiaamnionii</i>    | 1.862793       | 89.28244                  |
| BVAB2                          | 1.261917       | 90.54436                  |
| <i>Prevotellagenogroup1</i>    | 1.086990       | 91.63135                  |
| <i>Prevotellagenogroup2</i>    | 0.944979       | 92.57633                  |
| <i>Parvimonasmicra</i>         | 0.634080       | 93.21041                  |
| <i>Dialistersp.type2</i>       | 0.604308       | 93.81471                  |
| <i>Dialistersp.type1</i>       | 0.604234       | 94.41895                  |
| <i>Mycoplasmahominis</i>       | 0.447787       | 94.86673                  |
| <i>Prevotellagenogroup3</i>    | 0.403197       | 95.26993                  |
| <i>Gemella</i>                 | 0.374366       | 95.64430                  |
| <i>Raoultellaplanticola</i>    | 0.362705       | 96.00700                  |
| <i>Bifidobacteriumbreve</i>    | 0.322009       | 96.32901                  |
| <i>Porphyromonasbennonis</i>   | 0.252623       | 96.58163                  |
| <i>Streptococcusagalactiae</i> | 0.251228       | 96.83286                  |
| <i>Fusobacteriumnucleatum</i>  | 0.245746       | 97.07861                  |
| <i>Mobiluncusmulieris</i>      | 0.222894       | 97.30150                  |
| BVAB3                          | 0.205165       | 97.50667                  |

| <b>Taxa</b>                          | <b>Overall RA (%)</b> | <b>Cumulative overall RA (%)</b> |
|--------------------------------------|-----------------------|----------------------------------|
| <i>Lactobacillusvaginalis</i>        | 0.197353              | 97.70402                         |
| <i>Sutterellastercoricanis</i>       | 0.182583              | 97.88660                         |
| <i>Prevotellamelaninogenica</i>      | 0.179294              | 98.06590                         |
| <i>Arcanobacteriumphocae</i>         | 0.177894              | 98.24379                         |
| <i>Eggerthella</i>                   | 0.151240              | 98.39503                         |
| <i>Agrobacteriumtumefaciens</i>      | 0.129612              | 98.52464                         |
| <i>Finegoldiamagna</i>               | 0.112550              | 98.63719                         |
| <i>Clostridiumcolicanis</i>          | 0.108733              | 98.74593                         |
| <i>Howardellaureilytica</i>          | 0.106107              | 98.85203                         |
| <i>Megasphaerasp.type2</i>           | 0.104877              | 98.95691                         |
| <i>Prevotellabivia</i>               | 0.103267              | 99.06018                         |
| <i>Ureaplasmaparvum</i>              | 0.097113              | 99.15729                         |
| <i>Prevotellagenogroup4</i>          | 0.084164              | 99.24145                         |
| <i>Peptoniphilusharei</i>            | 0.069311              | 99.31077                         |
| <i>Anaerococcustetradius</i>         | 0.057485              | 99.36825                         |
| <i>Arcanobacteriumhippocoleae</i>    | 0.050693              | 99.41894                         |
| <i>Porphyromonasuenonis</i>          | 0.048448              | 99.46739                         |
| <i>Prevotellabuccalis</i>            | 0.043339              | 99.51073                         |
| <i>Peptostreptococcusanaerobius</i>  | 0.041611              | 99.55234                         |
| <i>Streptococcusoralis</i>           | 0.038228              | 99.59057                         |
| <i>Sutterellamoribirenis</i>         | 0.037930              | 99.62850                         |
| <i>Lactobacilluscoleohominis</i>     | 0.033233              | 99.66173                         |
| <i>Atopobiumminutum</i>              | 0.026683              | 99.68841                         |
| CandidateDivisionTM7vaginal          | 0.026461              | 99.71488                         |
| <i>Aerococcuschristensenii</i>       | 0.026210              | 99.74109                         |
| <i>Peptoniphilusindolicus</i>        | 0.025000              | 99.76609                         |
| <i>Dialisterpropionificiens</i>      | 0.024188              | 99.79027                         |
| <i>Bacteroidesuniformis</i>          | 0.023524              | 99.81380                         |
| <i>Peptoniphiluslacrimalis</i>       | 0.020093              | 99.83389                         |
| <i>Porphyromonasendodontalis</i>     | 0.019982              | 99.85387                         |
| <i>Prevotelladisiens</i>             | 0.016955              | 99.87083                         |
| <i>Porphyromonassp.type1</i>         | 0.014596              | 99.88542                         |
| <i>Prevotellagenogroup5</i>          | 0.010780              | 99.89620                         |
| <i>Peptostreptococcusstomatis</i>    | 0.008597              | 99.90480                         |
| <i>Peptoniphilusasaccharolyticus</i> | 0.008165              | 99.91297                         |
| <i>Anaerococcusvaginalis</i>         | 0.007989              | 99.92095                         |
| <i>Pseudomonasfluorescens</i>        | 0.007121              | 99.92808                         |
| <i>Prevotellagenogroup7</i>          | 0.007070              | 99.93515                         |
| <i>Streptococcusanginosus</i>        | 0.006958              | 99.94210                         |
| <i>Bifidobacteriumlongum</i>         | 0.006152              | 99.94826                         |
| <i>Enterococcusfaecalis</i>          | 0.005244              | 99.95350                         |
| <i>Veillonellaatypica</i>            | 0.005010              | 99.95851                         |

| <b>Taxa</b>                         | <b>Overall RA (%)</b> | <b>Cumulative overall RA (%)</b> |
|-------------------------------------|-----------------------|----------------------------------|
| <i>Roseburiafaecis</i>              | 0.004785              | 99.96329                         |
| <i>Prevotellagenogroup6</i>         | 0.003301              | 99.96660                         |
| <i>Lactobacillusmucosae</i>         | 0.003279              | 99.96987                         |
| <i>Mobiluncuscurtisii</i>           | 0.003067              | 99.97294                         |
| <i>Streptococcussalivarius</i>      | 0.003058              | 99.97600                         |
| <i>Varibaculumcambriense</i>        | 0.002839              | 99.97884                         |
| <i>Staphylococcus</i> hominis       | 0.002443              | 99.98128                         |
| <i>Mycoplasma</i> magenitalium      | 0.002217              | 99.98350                         |
| <i>Corynebacterium</i> accolens     | 0.001770              | 99.98527                         |
| <i>Staphylococcus</i> epidermidis   | 0.001516              | 99.98678                         |
| <i>Veillonella</i> parvula          | 0.001431              | 99.98822                         |
| <i>Alloscardovia</i> omnicolens     | 0.001133              | 99.98935                         |
| <i>Campylobacter</i> ureolyticus    | 0.001077              | 99.99043                         |
| <i>Actinomyces</i> meyeri           | 0.000984              |                                  |
| <i>Staphylococcus</i> lugdunensis   | 0.000937              |                                  |
| <i>Actinomyces</i> urogenitalis     | 0.000802              |                                  |
| <i>Veillonella</i> montpellierensis | 0.000778              |                                  |
| <i>Aerococcus</i> viridans          | 0.000756              |                                  |
| <i>Eubacterium</i> saphenum         | 0.000687              |                                  |
| <i>Streptococcus</i> equinus        | 0.000662              |                                  |
| <i>Shuttleworthia</i> satelles      | 0.000587              |                                  |
| <i>Bifidobacterium</i> bifidum      | 0.000488              |                                  |
| <i>Catonella</i> morbi              | 0.000479              |                                  |
| <i>Atopobium</i> rimae              | 0.000416              |                                  |
| <i>Streptococcus</i> anguinis       | 0.000365              |                                  |
| <i>Staphylococcus</i> haemolyticus  | 0.000344              |                                  |
| <i>Weissella</i> paramesenteroides  | 0.000335              |                                  |
| <i>Acinetobacter</i> baumannii      | 0.000219              |                                  |
| <i>Escherichia</i> coli             | 0.000175              |                                  |
| <i>Eubacterium</i> rectale          | 0.000098              |                                  |
| <i>Arcanobacterium</i> haemolyticum | 0.000095              |                                  |
| <i>Sutterella</i> wadsworthensis    | 0.000093              |                                  |
| <i>Pseudomonas</i> aeruginosa       | 0.000084              |                                  |
| <i>Lactobacillus</i> rhamnosus      | 0.000081              |                                  |
| <i>Staphylococcus</i> warneri       | 0.000028              |                                  |
| <i>Actinomyces</i> neuii            | 0.000028              |                                  |
| <i>Pediococcus</i> acidilactici     | 0.000028              |                                  |
| <i>Enterococcus</i> faecium         | 0.000015              |                                  |
| <i>Lactobacillus</i> casei          | 0.000011              |                                  |
| <i>Dialister</i> sp.type3           | <0.000001             |                                  |
| <i>Streptococcus</i> parasanguinis  | <0.000001             |                                  |
| <i>Eubacterium</i> meligens         | <0.000001             |                                  |

| Taxa                               | Overall RA (%) | Cumulative overall RA (%) |
|------------------------------------|----------------|---------------------------|
| <i>Lactobacillus salivarius</i>    | <0.000001      |                           |
| <i>Staphylococcus aureus</i>       | <0.000001      |                           |
| <i>Acinetobacter calcoaceticus</i> | <0.000001      |                           |
| <i>Pseudomonas stutzeri</i>        | <0.000001      |                           |
| <i>Eubacterium siraeum</i>         | <0.000001      |                           |

Supplementary Figure 1. Venn's diagram showing the distribution of the 140 study participants according to the diagnosis of microscopic- and molecular-bacterial vaginosis (BV).

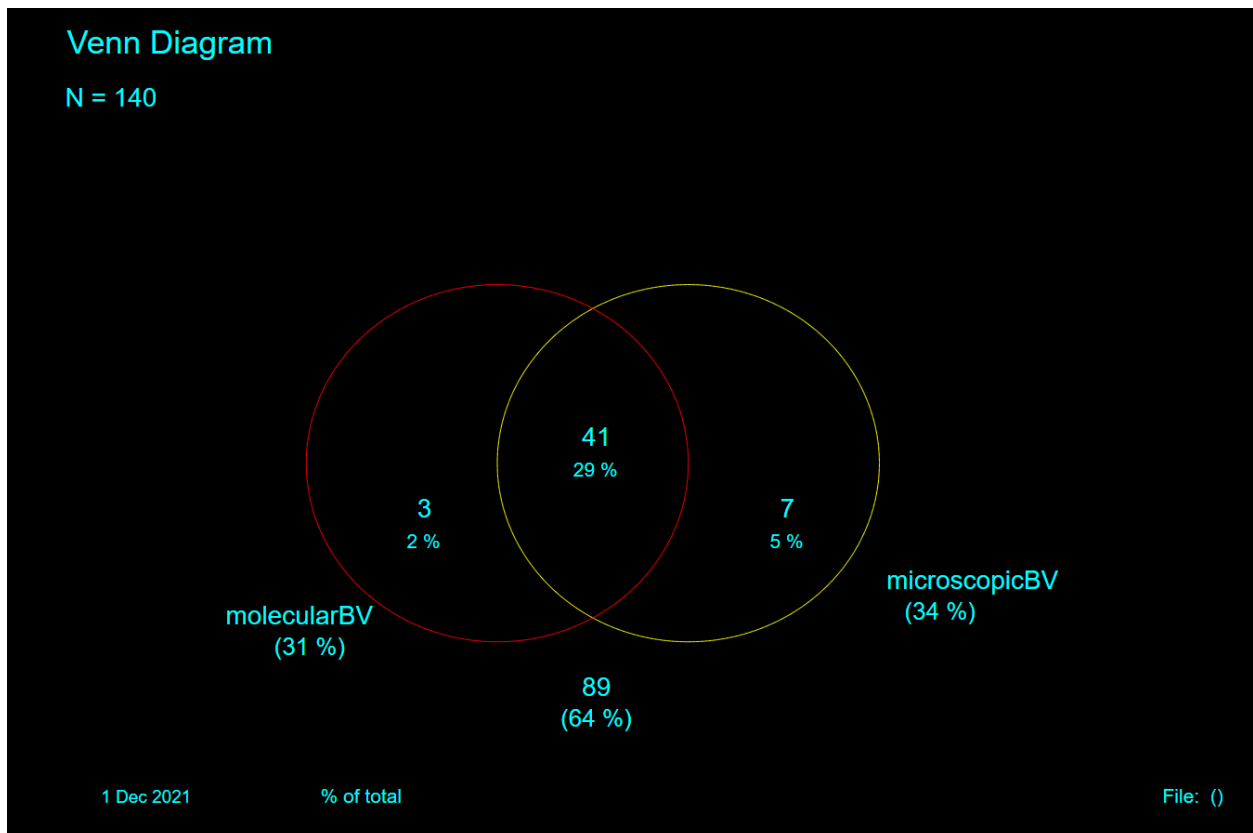

Supplement: DataSheet_1.pdf [file DataSheet_1.pdf]
